# Supplementary material for: Exposure to Nitrogen Oxide in the First Trimester and Risk of Cardiovascular-Related Malformations: A Dose-Response Meta-Analysis of Observational Studies
Source: Hindawi journal article supplement (doi:10.1155/2018/1948407), 2018-01-01
Supplement: f1 [file 1948407.f1.pdf]

**Exposure to nitrogen oxide in the first trimester and risk of cardiovascular-related malformations: a dose-response meta-analysis of observational studies.**

Tie-Ning Zhang<sup>1</sup>, Da Li<sup>2</sup>, Qi-Jun Wu<sup>3</sup>, Jing Xia<sup>1</sup>, Ri Wen<sup>1</sup>, Xing-Chen Chen<sup>4</sup>, Ni Yang<sup>1</sup>, Yan-Ling Chen<sup>5</sup>, Yan-Hong Huang<sup>6</sup>, Chun-Feng Liu<sup>1</sup>.

**Supplementary Table S1. Characteristics of the studies included in the meta-analysis.**

| <b>First author<br/>(ref), year,<br/>location</b> | <b>Study period</b> | <b>Study design</b>     | <b>Gestational period</b> | <b>Exposure</b> | <b>Outcomes<br/>(No. of cases)</b>       | <b>Risk estimates (95% CI)</b> |
|---------------------------------------------------|---------------------|-------------------------|---------------------------|-----------------|------------------------------------------|--------------------------------|
| Hwang (27),<br>2015, China                        | 2001-2007           | Case-control study      | First trimester           | NO <sub>2</sub> | ASD (194)                                | 0.98 (0.74-1.30)               |
|                                                   |                     |                         |                           |                 | Conotruncal Defects (404)                | 0.81 (0.60-1.10)               |
|                                                   |                     |                         |                           |                 | PDA (213)                                | 1.02 (0.78-1.33)               |
|                                                   |                     |                         |                           |                 | Pulmonary Artery and Valve (60)          | 0.77 (0.47-1.27)               |
|                                                   |                     |                         |                           |                 | TOF (111)                                | 1.11 (0.75-1.64)               |
|                                                   |                     |                         |                           |                 | Transposition of the Great Arteries (70) | 0.72 (0.44-1.16)               |
|                                                   |                     |                         |                           |                 | VSD (193)                                | 0.91 (0.68-1.22)               |
| Farhi (33), 2014,<br>Israel                       | 1997-2004           | Historical cohort-study | First trimester           | NO <sub>x</sub> | Circulatory system (1,634)               | 1.01 (0.99-1.03)               |
|                                                   |                     |                         |                           |                 | VSD (1,161)                              | 1.02 (0.99-1.04)               |
| Schembari (34),<br>2014, Spain*                   | 1994-2006           | Case-control study      | Week 3-8                  | NO <sub>2</sub> | ASD (229)                                | 1.20 (1.02-1.41)               |
|                                                   |                     |                         |                           |                 | COA (69)                                 | 1.13 (0.90-1.41)               |
|                                                   |                     |                         |                           |                 | CHD (823)                                | 1.36 (1.06-1.75)               |
|                                                   |                     |                         |                           |                 | TOF (49)                                 | 1.11 (0.75-1.64)               |
|                                                   |                     |                         |                           |                 | VSD (351)                                | 0.91 (0.68-1.22)               |

**Supplementary Table S1. (Continued)**

| <b>First author<br/>(ref), year,<br/>location</b> | <b>Study period</b> | <b>Study design</b>            | <b>Gestational period</b> | <b>Exposure</b> | <b>Outcomes<br/>(No. of cases)</b> | <b>Risk estimates (95% CI)</b> |
|---------------------------------------------------|---------------------|--------------------------------|---------------------------|-----------------|------------------------------------|--------------------------------|
| Stingone<br>(31),2014,<br>America                 | 1997-2006           | Case-control study             | Week 2-8                  | NO <sub>2</sub> | LVOTO (545)                        | 1.07 (1.00-1.16)               |
|                                                   |                     |                                |                           |                 | COA (215)                          | 1.21 (1.07-1.36)               |
|                                                   |                     |                                |                           |                 | Conotruncal (691)                  | 1.05 (0.98-1.12)               |
|                                                   |                     |                                |                           |                 | TOF (355)                          | 1.03 (0.94-1.13)               |
|                                                   |                     |                                |                           |                 | APVR (100)                         | 0.95 (0.83-1.09)               |
|                                                   |                     |                                |                           |                 | AVSD (53)                          | 0.92 (0.76-1.11)               |
|                                                   |                     |                                |                           |                 | RVOTO (459)                        | 1.16 (1.07-1.25)               |
|                                                   |                     |                                |                           |                 | Septal (944)                       | 1.05 (0.99-1.12)               |
|                                                   |                     |                                |                           |                 | ASD (461)                          | 1.03 (0.95-1.12)               |
| Agay-Shay (7),<br>2013, Israel                    | 2000-2006           | Registry-based<br>cohort study | Week 3-8                  | NO <sub>2</sub> | VSD (395)                          | 1.06 (0.99-1.15)               |
|                                                   |                     |                                |                           |                 | Isolated atrial and ASD (534)      | 0.93 (0.80-1.08)               |
|                                                   |                     |                                |                           |                 | Isolated PDA (147)                 | 1.03 (0.77-1.38)               |
|                                                   |                     |                                |                           |                 | Isolated VSD (493)                 | 0.99 (0.84-1.15)               |
|                                                   |                     |                                |                           |                 | Multiple CHD (569)                 | 0.96 (0.83-1.11)               |

**Supplementary Table S1. (Continued)**

| <b>First author<br/>(ref), year,<br/>location</b> | <b>Study period</b> | <b>Study design</b> | <b>Gestational period</b>      | <b>Exposure</b> | <b>Outcomes<br/>(No. of cases)</b>                 | <b>Risk estimates (95% CI)</b> |
|---------------------------------------------------|---------------------|---------------------|--------------------------------|-----------------|----------------------------------------------------|--------------------------------|
| Padula (30), 2013,<br>America*                    | 1997– 2006          | Case-control study  | First 2 months of<br>pregnancy | NO              | Aortic stenosis (23)                               | 1.04 (0.81-1.34)               |
|                                                   |                     |                     |                                |                 | COA (70)                                           | 1.02 (0.88-1.17)               |
|                                                   |                     |                     |                                |                 | Dextro-transposition of the<br>great arteries (54) | 0.94 (0.79-1.11)               |
|                                                   |                     |                     |                                |                 | Double outlet right ventricle –<br>other (14)      | 0.91 (0.63-1.33)               |
|                                                   |                     |                     |                                |                 | Heterotaxia (54)                                   | 0.97 (0.83-1.14)               |
|                                                   |                     |                     |                                |                 | Hypoplastic left heart<br>syndrome (53)            | 1.03 (0.87-1.21)               |
|                                                   |                     |                     |                                |                 | Pulmonary atresia (50)                             | 0.99 (0.84-1.18)               |
|                                                   |                     |                     |                                |                 | Secundum ASD (123)                                 | 1.01 (0.90-1.14)               |
|                                                   |                     |                     |                                |                 | TOF (88)                                           | 0.96 (0.83-1.10)               |
|                                                   |                     |                     |                                |                 | Total anomalous pulmonary<br>venous return (19)    | 0.95 (0.72-1.25)               |
|                                                   |                     |                     |                                |                 | VSD-muscular (46)                                  | 0.95 (0.79-1.14)               |
|                                                   |                     |                     |                                |                 | VSD-perimembranous (88)                            | 1.02 (0.89-1.17)               |

**Supplementary Table S1. (Continued)**

| <b>First author<br/>(ref), year,<br/>location</b> | <b>Study period</b> | <b>Study design</b> | <b>Gestational period</b> | <b>Exposure</b> | <b>Outcomes<br/>(No. of cases)</b>                 | <b>Risk estimates (95% CI)</b> |
|---------------------------------------------------|---------------------|---------------------|---------------------------|-----------------|----------------------------------------------------|--------------------------------|
|                                                   |                     |                     |                           | NO <sub>2</sub> | Aortic stenosis (26)                               | 0.86 (0.59-1.25)               |
|                                                   |                     |                     |                           |                 | Atrioventricular septal defects<br>(14)            | 1.00 (0.59-1.71)               |
|                                                   |                     |                     |                           |                 | COA (78)                                           | 1.10 (0.87-1.40)               |
|                                                   |                     |                     |                           |                 | Dextro-transposition of the<br>great arteries (63) | 1.25 (0.96-1.62)               |
|                                                   |                     |                     |                           |                 | Double outlet right ventricle –<br>TGA (17)        | 1.19 (0.79-1.81)               |
|                                                   |                     |                     |                           |                 | Heterotaxia (61)                                   | 0.99 (0.77-1.26)               |
|                                                   |                     |                     |                           |                 | Hypoplastic left heart<br>syndrome (61)            | 0.90 (0.69-1.18)               |
|                                                   |                     |                     |                           |                 | Pulmonary atresia (59)                             | 0.95 (0.73-1.24)               |
|                                                   |                     |                     |                           |                 | Secundum ASD (140)                                 | 0.92 (0.78-1.09)               |
|                                                   |                     |                     |                           |                 | Single ventricle or other<br>complex (21)          | 0.86 (0.59-1.25)               |
|                                                   |                     |                     |                           |                 | TOF (100)                                          | 1.05 (0.83-1.32)               |
|                                                   |                     |                     |                           |                 | Tricuspid atresia (18)                             | 0.88 (0.53-1.46)               |
|                                                   |                     |                     |                           |                 | VSD-conov (19)                                     | 1.02 (0.68-1.54)               |
|                                                   |                     |                     |                           |                 | VSD-muscular (48)                                  | 0.90 (0.69-1.16)               |
|                                                   |                     |                     |                           |                 | VSD-perimembranous (98)                            | 0.90 (0.71-1.14)               |

**Supplementary Table S1. (Continued)**

| <b>First author<br/>(ref), year,<br/>location</b> | <b>Study period</b> | <b>Study design</b> | <b>Gestational period</b> | <b>Exposure</b> | <b>Outcomes<br/>(No. of cases)</b>                  | <b>Risk estimates (95% CI)</b> |
|---------------------------------------------------|---------------------|---------------------|---------------------------|-----------------|-----------------------------------------------------|--------------------------------|
| Dadvand (32),<br>2011, United<br>Kingdom*         | 1993–2003           | Case-control study  | Week 3-8                  | NO              | Pooled-cases (2,140)                                | 1.07 (1.01-1.13)               |
|                                                   |                     |                     |                           |                 | ASD (274)                                           | 1.11 (0.95-1.30)               |
|                                                   |                     |                     |                           |                 | COA (125)                                           | 1.08 (0.85-1.39)               |
|                                                   |                     |                     |                           |                 | TOF (126)                                           | 1.25 (1.05-1.50)               |
|                                                   |                     |                     |                           |                 | VSD (1,154)                                         | 1.20 (1.13-1.29)               |
|                                                   |                     |                     |                           | NO <sub>2</sub> | Pooled-cases (2,140)                                | 0.90 (0.77-1.05)               |
|                                                   |                     |                     |                           |                 | ASD (274)                                           | 0.97 (0.63-1.46)               |
|                                                   |                     |                     |                           |                 | COA (125)                                           | 0.80 (0.43-1.47)               |
|                                                   |                     |                     |                           |                 | TOF (126)                                           | 0.94 (0.49-1.80)               |
|                                                   |                     |                     |                           |                 | VSD (1,154)                                         | 0.90 (0.73-1.11)               |
| Hansen (28),<br>2009, Australia*                  | 1998-2004           | Case-control study  | Week 3-8                  | NO <sub>2</sub> | Aortic artery and valve defect<br>(63)              | 1.58 (0.40-6.15)               |
|                                                   |                     |                     |                           |                 | ASD (127)                                           | 1.24 (0.53-2.93)               |
|                                                   |                     |                     |                           |                 | Conotruncal Defects (63)                            | 0.30 (0.07-1.34)               |
|                                                   |                     |                     |                           |                 | Endocardial cushion and mitral<br>valve defect (33) | 3.04 (0.51-18.06)              |
|                                                   |                     |                     |                           |                 | Pulmonary artery and valve<br>defect (64)           | 1.10 (0.29-4.15)               |
|                                                   |                     |                     |                           |                 | VSD (222)                                           | 0.77 (0.21-2.85)               |

**Supplementary Table S1. (Continued)**

| <b>First author<br/>(ref), year,<br/>location</b> | <b>Study period</b> | <b>Study design</b>           | <b>Gestational period</b> | <b>Exposure</b> | <b>Outcomes<br/>(No. of cases)</b>              | <b>Risk estimates (95% CI)</b> |
|---------------------------------------------------|---------------------|-------------------------------|---------------------------|-----------------|-------------------------------------------------|--------------------------------|
| Strickland (29),<br>2009, America*                | 1986-2003           | Retrospective<br>cohort study | Week 3-7                  | NO <sub>2</sub> | ASD, secundum (379)                             | 1.28 (0.87-1.88)               |
|                                                   |                     |                               |                           |                 | COA (275)                                       | 1.21 (0.79-1.83)               |
|                                                   |                     |                               |                           |                 | Conotruncal defect (661)                        | 0.91 (0.69-1.21)               |
|                                                   |                     |                               |                           |                 | Hypoplastic left heart<br>syndrome (175)        | 0.85 (0.49-1.47)               |
|                                                   |                     |                               |                           |                 | Left ventricular outflow tract<br>defect (558)  | 1.02 (0.75-1.38)               |
|                                                   |                     |                               |                           |                 | Patent ductus arteriosus (219)                  | 1.52 (0.92-2.51)               |
|                                                   |                     |                               |                           |                 | Pulmonary stenosis, valvar<br>(312)             | 1.02 (0.67-1.54)               |
|                                                   |                     |                               |                           |                 | Right ventricular outflow tract<br>defect (421) | 1.04 (0.73-1.47)               |
|                                                   |                     |                               |                           |                 | TOF (299)                                       | 0.90 (0.59-1.37)               |
|                                                   |                     |                               |                           |                 | Transposition of the great<br>arteries (165)    | 0.68 (0.38-1.21)               |
|                                                   |                     |                               |                           |                 | VSD, muscular (1,108)                           | 1.16 (0.93-1.46)               |
|                                                   |                     |                               |                           |                 | VSD, perimembranous (546)                       | 1.21 (0.90-1.65)               |

\* For dose-response, original data of study was converted into “10 ppb increment” as displayed.

Abbreviations: APVR, anomalous pulmonary venous return; ASD, atrial septal defect; AVSD, atrioventricular septal defect; CHD, congenital heart defect; CI: confidence interval; COA, coarctation of the aorta; LVOTO, left ventricular outflow tract obstructions; RVOTO, right ventricular outflow tract obstructions; TOF, tetralogy of Follot; PDA, patent ductus arteriosus; VSD, ventricular septal defect.

**Supplementary Table S2. Adjusted factors of the studies included in the meta-analysis.**

| <b>First author (ref), year,<br/>location</b> | <b>Adjusted factors</b>                                                                                                                                                                |
|-----------------------------------------------|----------------------------------------------------------------------------------------------------------------------------------------------------------------------------------------|
| Hwang (27), 2015, China                       | Maternal age, diabetes mellitus, plurality, gestational age, SES, and season of conception.                                                                                            |
| Farhi (33), 2014, Israel                      | Maternal age, maternal ethnicity, maternal country of birth, maternal education, plurality, season of birth and infant gender.                                                         |
| Schembari (34), 2014, Spain                   | Maternal age, conception season, year of birth/termination, socioeconomic index.                                                                                                       |
| Stingone (31), 2014, America                  | Maternal race, age, educational attainment, household income, maternal smoking status, and alcohol consumption during early pregnancy, nativity, and site-specific heart defect ratio. |
| Agay-Shay (7), 2013, Israel                   | Multi-births, maternal age, maternal marital status, maternal origin of birth, infant's sex, religion, year of birth, season of conception, ward-base SES.                             |
| Padula (30), 2013, America                    | Maternal race/ethnicity, education and vitamin use (for the month prior to and/or first 2 months of pregnancy).                                                                        |
| Dadvand (32), 2011, United Kingdom            | Year of birth, SES, degree of urbanity, and season of conception.                                                                                                                      |
| Hansen (28), 2009, Australia                  | Neonate sex.                                                                                                                                                                           |



**Supplementary Table S2. Adjusted factors of the studies included in the meta-analysis. (Continued)**

| First author (ref), year,<br>location | Adjusted factors                                     |
|---------------------------------------|------------------------------------------------------|
| Strickland (29), 2009, America        | Week of year, and cubic spline for day of follow-up. |

Abbreviations: SES, socioeconomic status.

**Supplementary Table S3. Methodological quality of case-control studies included in the meta-analysis\***

| First author<br>(reference),<br>publication<br>year | Case<br>definition<br>adequate | Representativeness<br>of the cases | Selection<br>of<br>Controls | Definition<br>of<br>Controls | Comparability of<br>cases and controls<br>on the basis of the<br>design or analysis <sup>†</sup> | Ascertainment<br>of exposure | Same method of<br>ascertainment<br>for cases and<br>controls | Non-Response<br>rate <sup>‡</sup> |
|-----------------------------------------------------|--------------------------------|------------------------------------|-----------------------------|------------------------------|--------------------------------------------------------------------------------------------------|------------------------------|--------------------------------------------------------------|-----------------------------------|
| Hwang (27),<br>2015                                 | *                              | *                                  | *                           | *                            | **                                                                                               | *                            | *                                                            | *                                 |
| Schembari<br>(34), 2014                             | *                              | *                                  | *                           | *                            | **                                                                                               | *                            | *                                                            | -                                 |
| Stingone (31),<br>2014                              | *                              | *                                  | *                           | *                            | **                                                                                               | *                            | *                                                            | *                                 |
| Padula (30),<br>2013                                | *                              | *                                  | *                           | *                            | -                                                                                                | *                            | *                                                            | *                                 |
| Dadvand (32),<br>2011                               | *                              | *                                  | *                           | *                            | *                                                                                                | *                            | *                                                            | -                                 |
| Hansen (28),<br>2009                                | *                              | *                                  | *                           | *                            | -                                                                                                | *                            | *                                                            | -                                 |

\* A study could be awarded a maximum of one star for each item except for the item Control for important factor or additional factor. The definition/explanation of each column of the Newcastle-Ottawa Scale is available from ([http://www.ohri.ca/programs/clinical\\_epidemiology/oxford.asp](http://www.ohri.ca/programs/clinical_epidemiology/oxford.asp)).

<sup>†</sup> A maximum of 2 stars could be awarded for this item. Studies that controlled for maternal age, whereas studies that controlled for socioeconomic status received an additional star.

<sup>‡</sup> A case-control study with a non-response rate <10% was assigned one star.

**Supplementary Table S3. Methodological quality of cohort studies included in the meta-analysis \***

| <b>First author<br/>(reference),<br/>publication<br/>year</b> | <b>Representativeness<br/>of the exposed<br/>cohort</b> | <b>Selection of<br/>the<br/>unexposed<br/>cohort</b> | <b>Ascertainment<br/>of exposure</b> | <b>Outcome of<br/>interest not<br/>present at<br/>start of<br/>study</b> | <b>Control for<br/>important<br/>factor or<br/>additional<br/>factor †</b> | <b>Assessment<br/>of outcome</b> | <b>Follow-up<br/>long enough<br/>for outcomes<br/>to occur ‡</b> | <b>Adequacy of<br/>follow-up of<br/>cohorts§</b> |
|---------------------------------------------------------------|---------------------------------------------------------|------------------------------------------------------|--------------------------------------|--------------------------------------------------------------------------|----------------------------------------------------------------------------|----------------------------------|------------------------------------------------------------------|--------------------------------------------------|
| Farhi (33),<br>2014                                           | *                                                       | *                                                    | *                                    | *                                                                        | *                                                                          | *                                | -                                                                | -                                                |
| Agay-Shay (7),<br>2013                                        | *                                                       | *                                                    | *                                    | *                                                                        | **                                                                         | *                                | -                                                                | -                                                |
| Strickland<br>(29), 2009                                      | *                                                       | *                                                    | *                                    | *                                                                        | -                                                                          | *                                | -                                                                | -                                                |

\* A study could be awarded a maximum of one star for each item except for the item Control for important factor or additional factor. The definition/explanation of each column of the Newcastle-Ottawa Scale is available from ([http://www.ohri.ca/programs/clinical\\_epidemiology/oxford.asp](http://www.ohri.ca/programs/clinical_epidemiology/oxford.asp)).

† A maximum of 2 stars could be awarded for this item. Studies that controlled for maternal age, whereas studies that controlled for socioeconomic status received an additional star.

‡ A cohort study with a follow-up time >1 year was assigned one star.

§ A cohort study with a follow-up rate >80% was assigned one star.
